# Supplementary material
Source: PubMed Central journal article supplement (PMC4616932)
Supplement: AEM.02426-15_zam999116704so1.pdf [file AEM.02426-15_zam999116704so1.pdf]

## Supplementary materials

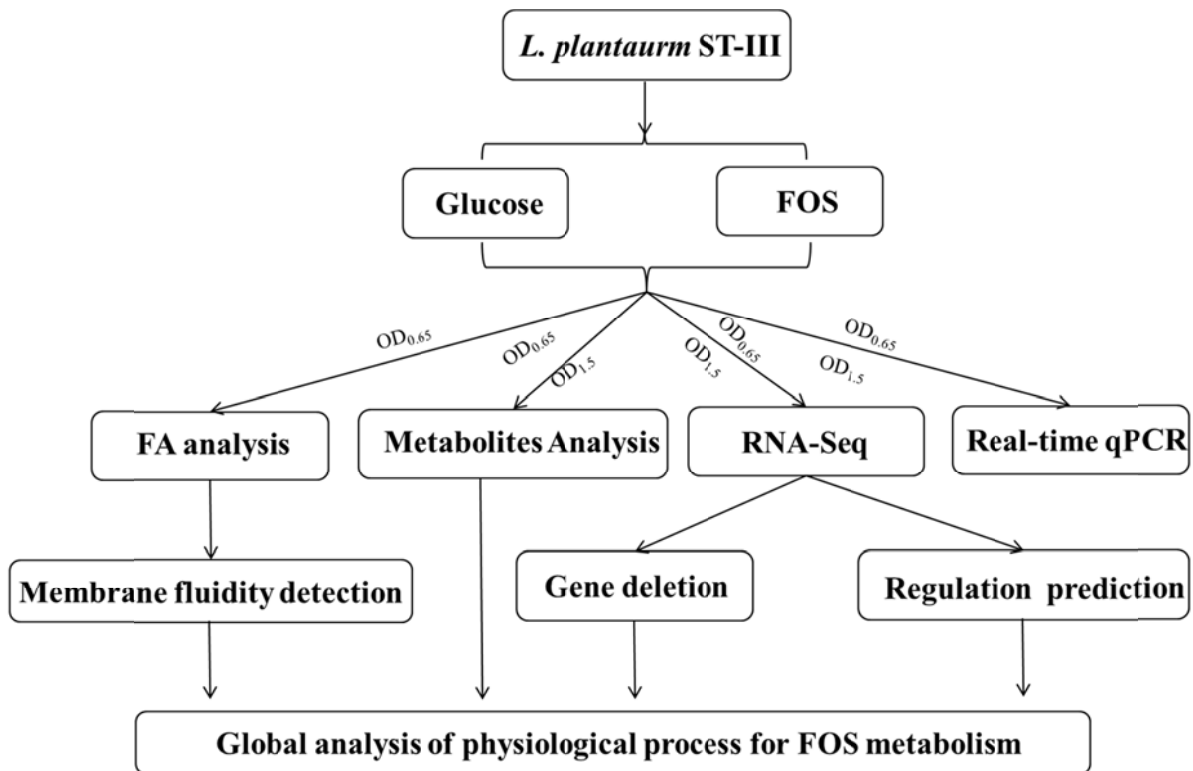

**Fig. S1** Work flow of the transcriptomic and physiological analysis of FOS metabolism in *Lactobacillus plantarum* ST-III

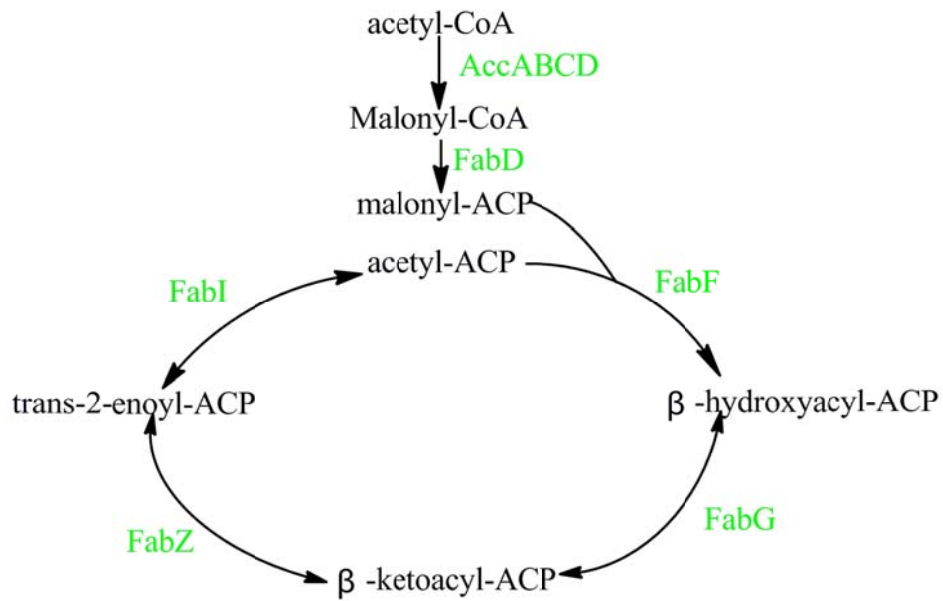

**Fig. S2** The down-regulated genes related to fatty acids biosynthesis for *L. plantarum* ST-III grown in the presence of FOS versus glucose. Genes that are up-regulated are in green color. CoA, coenzyme A; ACP, acyl carrier protein; AccABCD, Acetyl-CoA carboxylase; FabD, ACP-S-malonyltransferase; FabI, enoyl-ACP reductase; FabF, 3-oxoacyl-ACP synthase II; FabZ, (3R)-hydroxymyristoyl-ACP dehydratase; FabG, 3-oxoacyl-ACP reductase.

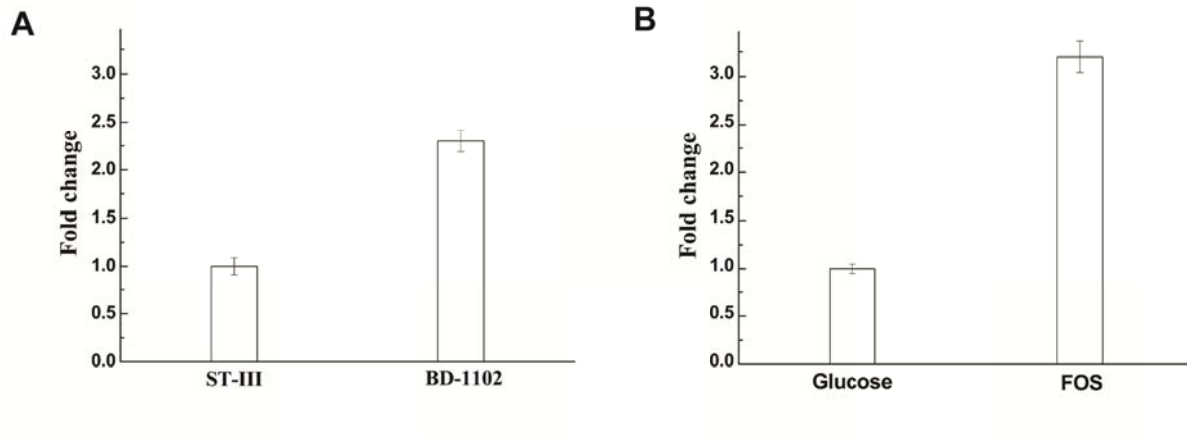

**Fig. S3** The relative gene expression of *pts26* in BD1102 mutant grown on FOS compared with ST-III grown on FOS (A) and the value obtained in BD1102 mutant grown on FOS compared with glucose (B).

**Table S1** Primers used in the mutants construction

| ID | Primer                    | Sequence (5' to 3')           | Reference |
|----|---------------------------|-------------------------------|-----------|
| A  | <i>sacA</i> upstream F    | GTGAACGTAAAGTCAAATGCACC       | This work |
| B  | <i>sacA</i> upstream R    | TACGATTCCATATCATGACGATGAG     | This work |
| C  | <i>sacA</i> downstream F  | ATACTGGAGTCGATAACAATGAAACC    | This work |
| D  | <i>sacA</i> downstream R  | CGGTTGTTCTACTGTTGTTAATTCAG    | This work |
| E  | <i>pts1</i> upstream F    | GATGATTCATAATAATTCACCTCCCTGAG | This work |
| F  | <i>pts1</i> upstream R    | TGGTCAGATCCTTTGAGAAATAAAC     | This work |
| G  | <i>pts1</i> downstream F  | TTAAAGCAGCCTGAGCTAACAATAG     | This work |
| H  | <i>pts1</i> downstream R  | CTGCTACAGCGATATAAAAACGATCT    | This work |
| I  | <i>pts26</i> upstream F   | CAATAATTTTTTTTCGCAAGTACCTG    | This work |
| J  | <i>pts26</i> upstream R   | ATGACCAACTTGGACAATTTATTGG     | This work |
| K  | <i>pts26</i> downstream F | TTCACATTGTTTCGCCATAAGACTC     | This work |
| L  | <i>pts26</i> downstream R | CTGCAACAGCATCCTAAACGTAAG      | This work |
| M  | <i>sacA</i> -outI         | CGACTGGGAAGATAAAAAGAACCT      | This work |
| N  | <i>sacA</i> -outII        | TAAGGCCCTTGATGAGCTTAACT       | This work |
| O  | <i>pts1</i> -outI         | GTTTGTGATAACCCTTGGGGAC        | This work |
| P  | <i>pts1</i> -outII        | TCATTAACCGAATGACAAATTGACT     | This work |
| Q  | <i>pts26</i> -outI        | CGACCTGGTATTGAAAAGTTCTTAG     | This work |
| R  | <i>pts26</i> -outII       | AAACCTATAACCACCGATTTGTTAAG    | This work |
| S  | 85                        | GTTTTTTTCTAGTCCAAGCTCACA      | (1)       |
| T  | 87                        | GCCGACTGTACTTTTCGGATCCT       | (1)       |

**Table S2** Primers and the results of RT-qPCR

| Gene  | Locus      | Primer | Sequence (5' to 3')        | Produ<br>cts<br>(bp) | Fold Change |            |
|-------|------------|--------|----------------------------|----------------------|-------------|------------|
|       |            |        |                            |                      | OD=0.<br>65 | OD=1.<br>5 |
| sacK1 | LPST_C0151 | F      | TTAATGGTCGCACTCATACTGAAC   | 116                  | 28.74       | 20.75      |
|       |            | R      | CCAGCAGCTAAACCTTCTAAACAG   |                      |             |            |
| pts1  | LPST_C0152 | F      | CGGAATTACGGAACCTGCTAT      | 187                  | 24.15       | 15.32      |
|       |            | R      | CATGAATGCTGGAATCGACTT      |                      |             |            |
| sacA  | LPST_C0153 | F      | GGATGGACACGGATAATCACATT    | 177                  | 4.04        | 2.56       |
|       |            | R      | TTGAGAAATAAACCAAGATAGCACC  |                      |             |            |
| sacR  | LPST_C0154 | F      | ACGGTCTTCCGATTATTTTCATT    | 196                  | 6.11        | 5.42       |
|       |            | R      | AAGTAGGCTTCATATCCTTCACG    |                      |             |            |
| agl2  | LPST_C0155 | F      | CTATCAGGTCTATCCACGGAGTT    | 143                  | 4.36        | 5.23       |
|       |            | R      | CGTTGGGTGAACGATAAATGG      |                      |             |            |
| ack2  | LPST_C0255 | F      | GTCAGGGTACTTGGTATTTTCAGG   | 156                  | 6.12        | 8.24       |
|       |            | R      | TCAATCCCGTTCATTTTCAGCA     |                      |             |            |
| pta   | LPST_C0630 | F      | TTTTGAAGCGGTGGGTCTGT       | 120                  | 3.32        | 4.23       |
|       |            | R      | GCTAATCCTTGGGCTGCTGTAAT    |                      |             |            |
| pox2  | LPST_C0667 | F      | ATCGGCGTTTCATTTGGTTCT      | 130                  | 2.23        | 2.17       |
|       |            | R      | TCGTGTTTCATCGTCGCTTGTG     |                      |             |            |
| IdhL1 | LPST_C1774 | F      | TACGCCAGACACCGTTTATC       | 133                  | 2.95        | 4.14       |
|       |            | R      | ATAGCACCATATCCGCCATTC      |                      |             |            |
| pdhD  | LPST_C1775 | F      | TCTTGAAGGGACACCGCAAAT      | 153                  | 25.21       | 24.22      |
|       |            | R      | GCGTAGGTAACCGTAACACCACTATC |                      |             |            |
| pdhC  | LPST_C1776 | F      | TGCCAAAGAAATTACTGACAATACG  | 173                  | 45.21       | 20.12      |
|       |            | R      | TACCGATACGCCAACACCT        |                      |             |            |
| pdhB  | LPST_C1777 | F      | TGCGATTCAAGAAGCACAACG      | 132                  | 30.19       | 25.84      |
|       |            | R      | CCGAATGGGTAGACCGTATCTG     |                      |             |            |
| pdhA  | LPST_C1778 | F      | TTAATGCCTGCTTACCGTGAT      | 145                  | 22.55       | 21.23      |
|       |            | R      | CGCCGATAATAATCTGTGGTG      |                      |             |            |
| pox3  | LPST_C2161 | F      | GCACCATCATTTGGATTTTCGG     | 130                  | 5.73        | 15.63      |
|       |            | R      | TTTCCAGTCAGCCATACTGCT      |                      |             |            |
| pgb6  | LPST_C2478 | F      | TCCTGCGACAGCAACCACTTC      | 166                  | 2.40        | 1.97       |
|       |            | R      | CCCAGCGGCATTAAACTCACC      |                      |             |            |

| Gene  | Locus      | Primer | Sequence (5' to 3')        | Produ<br>cts<br>(bp) | Fold Change |            |
|-------|------------|--------|----------------------------|----------------------|-------------|------------|
|       |            |        |                            |                      | OD=0.<br>65 | OD=1.<br>5 |
| pgb1  | LPST_C2580 | F      | CTGCTCATCAGTTTGAGGGTG      | 143                  | 7.15        | 4.46       |
|       |            | R      | CGCCTCGTGATTTGGATAGTT      |                      |             |            |
| pts26 | LPST_C2650 | F      | TTTTAACCAGTGGGATAGGTGC     | 137                  | 2.33        | 3.32       |
|       |            | R      | CGAGACGACCGTATAAATCAGC     |                      |             |            |
| agl4  | LPST_C2651 | F      | GGCTCTAAGGAAACGAATCTATC    | 142                  | 2.40        | 2.93       |
|       |            | R      | ACCTAACCCATCAACACCATC      |                      |             |            |
| sacR2 | LPST_C2652 | F      | AAACGGATACGGGTTTCAAGT      | 162                  | 4.41        | 4.99       |
|       |            | R      | TTAGCATAACGTCGCCGACAAT     |                      |             |            |
| pflB2 | LPST_C2728 | F      | CCCACATTGGTGATGGTGAAT      | 132                  | 7.06        | 4.21       |
|       |            | R      | TTGCAGGCTTGCTAATATCGT      |                      |             |            |
| pflA2 | LPST_C2729 | F      | GGATTCGTCACGTCCTGGTTC      | 130                  | 27.78       | 21.25      |
|       |            | R      | CCCAAAGTATGGTACGGCAAT      |                      |             |            |
| pox5  | LPST_C2933 | F      | GACGCATTATCAGCAGAAAGG      | 189                  | 11.39       | 24.31      |
|       |            | R      | AACAGGGACATGGTCTTCACG      |                      |             |            |
| srlR2 | LPST_C2986 | F      | AATCATTGGCTGTGAGTCGTG      | 194                  | 3.38        | 4.73       |
|       |            | R      | ATCCCAGGTTGCTTCCAGTTC      |                      |             |            |
| srlD2 | LPST_C2987 | F      | AGTGTTTATTACAGCAACTAAGGGAG | 166                  | 2.03        | 1.98       |
|       |            | R      | TATGCCGGGTATAAGCTAACG      |                      |             |            |
| fabZ1 | LPST_C1327 | F      | TGTCCGTCCCGGTGATGTCTT      | 113                  | 0.11        | 0.23       |
|       |            | R      | CAGTTGTGCAGGCTGCCTTGT      |                      |             |            |
| fabH2 | LPST_C1328 | F      | AATCATTGGCTGTGAGTCGTG      | 194                  | 0.15        | 0.08       |
|       |            | R      | ATCCCAGGTTGCTTCCAGTTC      |                      |             |            |
| acpA2 | LPST_C1329 | F      | GATGATCGTGGAACAATTAGACGT   | 175                  | 0.15        | 0.20       |
|       |            | R      | AACTAAATCACCAACCGTGGC      |                      |             |            |
| fabD  | LPST_C1330 | F      | ACTTTGCGGCCTGCTTACAAC      | 185                  | 0.07        | 0.10       |
|       |            | R      | TCCACGCTCACGTACCTCCTC      |                      |             |            |
| fabG1 | LPST_C1331 | F      | CACTGGAGCTGCTAAGGGTATTG    | 153                  | 0.06        | 0.16       |
|       |            | R      | TCACCAACTAATTGCGTCAACC     |                      |             |            |
| fabF  | LPST_C1332 | F      | TAGTAACGCCAGCAACTCAACATC   | 101                  | 0.13        | 0.21       |
|       |            | R      | CACCCACTTCTTAAAGGCAACC     |                      |             |            |
| accB2 | LPST_C1333 | F      | ACTTAGCTGCCGACCCGAAAC      | 125                  | 0.07        | 0.15       |
|       |            | R      | CCCCTAACTGGGCTAGGGACTT     |                      |             |            |

| Gene  | Locus      | Primer | Sequence (5' to 3')     | Produ<br>cts<br>(bp) | Fold Change |            |
|-------|------------|--------|-------------------------|----------------------|-------------|------------|
|       |            |        |                         |                      | OD=0.<br>65 | OD=1.<br>5 |
| fabZ2 | LPST_C1334 | F      | CCGTATCGTAGCGGTCCAACC   | 154                  | 0.08        | 0.16       |
|       |            | R      | TAAAGCCACAACCTCCCGTTTG  |                      |             |            |
| accC2 | LPST_C1335 | F      | CCGTATCGTAGCGGTCCAACC   | 154                  | 0.13        | 0.21       |
|       |            | R      | TAAAGCCACAACCTCCCGTTTG  |                      |             |            |
| accD2 | LPST_C1336 | F      | TTTCAAGCACCCACTGAACGG   | 159                  | 0.09        | 0.10       |
|       |            | R      | AGCAGGCAAGCGAAACCCAT    |                      |             |            |
| accA2 | LPST_C1337 | F      | ATGCGGAATATGAGGGACAAGG  | 116                  | 0.11        | 0.12       |
|       |            | R      | TAATGCACCACCACTGCCACC   |                      |             |            |
| fabI  | LPST_C1338 | F      | AAGTTTACAGCGGTTTGTTGCG  | 200                  | 0.11        | 0.13       |
|       |            | R      | CCAAATCATATCCAGCTTTCGTG |                      |             |            |
| -     | LPST_C1339 | F      | TGGACGGCTAAAGAAGCGGTAT  | 148                  | 0.12        | 0.19       |
|       |            | R      | GAGTCGCAGGCAATTCTAACG   |                      |             |            |
| -     | LPST_C1340 | F      | CACGGTTTGTCAAAGCACCAG   | 179                  | 0.23        | 0.18       |
|       |            | R      | TACCGCAGCAAAGAAGTCCAG   |                      |             |            |
| -     | LPST_C1341 | F      | TGCTGAATCAGGGTGATGGTG   | 183                  | 0.18        | 0.17       |
|       |            | R      | GGCTATACTTCGTGCGAAACG   |                      |             |            |
| -     | LPST_C1342 | F      | GCTGATTTGAATGAGCACGACA  | 104                  | 0.24        | 0.25       |
|       |            | R      | ACCGTCTCAATTCGAGCCACT   |                      |             |            |

**Table S3** Summary of the RNA-seq data

|                          | FOS        | Glucose    |
|--------------------------|------------|------------|
| Average read length      | 101 bp     | 101 bp     |
| Number of reads          | 27,107,812 | 17,145,874 |
| Number of mappable reads | 26,497,608 | 16,941,988 |
| Sequencing depth         | 524 fold   | 827 fold   |
| Map-rate                 | 0.97749    | 0.988109   |



**Table S4** The up-regulated genes for *L.plantarum* ST-III grown in the presence of FOS versus glucose

| COG  | Locus      | Gene  | Products                                                   | Fold Change |
|------|------------|-------|------------------------------------------------------------|-------------|
| [G]  | LPST_C0019 | glgC  | glucose-1-phosphate adenylyltransferase                    | 2.00        |
| [G]  | LPST_C0021 | glgA  | starch synthase                                            | 2.12        |
| [K]  | LPST_C0037 | -     | transcription regulator                                    | 2.20        |
| [TQ] | LPST_C0052 | -     | hypothetical protein                                       | 2.60        |
| [CR] | LPST_C0068 | -     | oxidoreductase                                             | 2.22        |
|      | LPST_C0077 | -     | hypothetical protein                                       | 3.03        |
| [R]  | LPST_C0086 | -     | phosphoribosylaminoimidazole carboxylase catalytic subunit | 3.15        |
| [H]  | LPST_C0092 | thiM  | hydroxyethylthiazole kinase                                | 4.29        |
| [H]  | LPST_C0093 | thiD  | phosphomethylpyrimidine kinase                             | 3.19        |
| [H]  | LPST_C0094 | thiE  | thiamine-phosphate diphosphorylase                         | 3.46        |
| [F]  | LPST_C0095 | -     | purine-cytosine transport protein                          | 2.75        |
| [KT] | LPST_C0108 | -     | hypothetical protein                                       | 3.01        |
| [S]  | LPST_C0115 | -     | hypothetical protein                                       | 2.51        |
|      | LPST_C0116 | -     | extracellular protein                                      | 2.04        |
| [K]  | LPST_C0123 | -     | hypothetical protein                                       | 5.57        |
|      | LPST_C0124 | -     | hypothetical protein                                       | 4.04        |
|      | LPST_C0125 | -     | hypothetical protein                                       | 6.15        |
| [S]  | LPST_C0137 | -     | hypothetical protein                                       | 2.98        |
| [G]  | LPST_C0138 | gplF2 | glycerol uptake facilitator protein                        | 2.13        |
| [K]  | LPST_C0140 | -     | transcription regulator                                    | 2.51        |
| [G]  | LPST_C0143 | malF  | maltose/maltodextrin ABC transporter, permease protein     | 2.63        |
| [G]  | LPST_C0146 | amy2  | alpha-amylase                                              | 2.13        |
| [G]  | LPST_C0148 | map2  | maltose phosphorylase                                      | 2.01        |
| [KG] | LPST_C0151 | sacK1 | fructokinase                                               | 34.90       |
| [G]  | LPST_C0152 | pts1  | sucrose PTS, EIIBCA                                        | 26.29       |
| [G]  | LPST_C0153 | sacA  | beta-fructofuranosidase                                    | 4.05        |
| [K]  | LPST_C0154 | sacR  | sucrose operon repressor                                   | 6.99        |
| [G]  | LPST_C0155 | agl2  | alpha-glucosidase                                          | 7.60        |

| COG    | Locus      | Gene  | Products                                                     | Fold Change |
|--------|------------|-------|--------------------------------------------------------------|-------------|
| [G]    | LPST_C0157 | agl3  | alpha-glucosidase                                            | 4.94        |
| [P]    | LPST_C0177 | -     | ABC transporter, permease protein                            | 2.44        |
| [P]    | LPST_C0178 | -     | ABC transporter, ATP-binding protein                         | 3.78        |
| [S]    | LPST_C0179 | -     | ABC transporter subunit (putative)                           | 3.04        |
| [K]    | LPST_C0188 | mtlR  | transcription regulator                                      | 2.05        |
| [G]    | LPST_C0189 | pts2A | mannitol PTS, EIIA                                           | 3.30        |
| [G]    | LPST_C0190 | mtlD  | mannitol-1-phosphate 5-dehydrogenase                         | 3.08        |
|        | LPST_C0195 | -     | hypothetical protein                                         | 19.20       |
| [F]    | LPST_C0196 | ndk   | nucleoside-diphosphate kinase                                | 3.51        |
| [S]    | LPST_C0202 | -     | hypothetical protein                                         | 2.79        |
| [E]    | LPST_C0209 | cysK  | cysteine synthase                                            | 2.12        |
| [G]    | LPST_C0217 | -     | beta-glucosides PTS, EIIABC                                  | 2.07        |
| [G]    | LPST_C0218 | -     | beta-glucosides PTS, EIIABC                                  | 2.02        |
|        | LPST_C0221 | -     | hypothetical protein                                         | 5.76        |
| [G]    | LPST_C0234 | pts6C | cellobiose PTS, EIIC                                         | 5.26        |
|        | LPST_C0247 | -     | CAAX family protease                                         | 2.17        |
| [C]    | LPST_C0255 | ack2  | acetate kinase                                               | 6.36        |
| [R]    | LPST_C0282 | -     | integral membrane protein                                    | 2.90        |
| [Q]    | LPST_C0299 | sufI  | cell division protein SufI                                   | 3.29        |
| [IQR]  | LPST_C0307 | -     | short chain dehydrogenase/reductase family<br>oxidoreductase | 2.01        |
| [C]    | LPST_C0312 | glpK  | glycerol kinase                                              | 16.95       |
| [C]    | LPST_C0313 | glpD  | glycerol-3-phosphate dehydrogenase                           | 44.55       |
| [G]    | LPST_C0314 | glpF3 | glycerol uptake facilitator protein                          | 33.70       |
| [R]    | LPST_C0327 | thgA1 | galactoside O-acetyltransferase                              | 2.37        |
| [GEPR] | LPST_C0328 | -     | transport protein                                            | 2.60        |
| [R]    | LPST_C0329 | -     | HAD superfamily hydrolase                                    | 2.50        |
| [R]    | LPST_C0331 | -     | HAD superfamily hydrolase                                    | 2.12        |
| [G]    | LPST_C0363 | pts7C | cellobiose PTS, EIIC                                         | 2.98        |
|        | LPST_C0364 | -     | hypothetical protein                                         | 9.17        |
|        | LPST_C0365 | -     | hypothetical protein                                         | 4.39        |
| [G]    | LPST_C0366 | pts8C | cellobiose PTS, EIIC                                         | 2.09        |
|        | LPST_C0393 | -     | integral membrane protein                                    | 2.69        |
| [J]    | LPST_C0408 | serS1 | serine--tRNA ligase                                          | 3.78        |

| COG  | Locus      | Gene  | Products                                                             | Fold Change |
|------|------------|-------|----------------------------------------------------------------------|-------------|
| [P]  | LPST_C0543 | phnE1 | phosphonates ABC transporter, permease protein                       | 2.43        |
| [L]  | LPST_C0562 | comFA | ATP-dependent DNA helicase/translocase (putative)                    | 2.01        |
| [R]  | LPST_C0563 | -     | late competence protein                                              | 2.56        |
|      | LPST_C0620 | secG  | preprotein translocase subunit SecG                                  | 2.55        |
|      | LPST_C0624 | -     | cell surface protein                                                 | 2.03        |
| [L]  | LPST_C0629 | ung   | uracil-DNA glycosylase                                               | 2.42        |
| [C]  | LPST_C0630 | pta   | phosphotransacetylase                                                | 2.90        |
| [EH] | LPST_C0667 | pox2  | putative pyruvate oxidase                                            | 2.63        |
|      | LPST_C0672 | -     | probable organic hydroperoxide resistance protein                    | 3.19        |
|      | LPST_C0673 | -     | transposase                                                          | 2.18        |
| [G]  | LPST_C0691 | -     | PTS, EIIA (putative)                                                 | 9.18        |
| [K]  | LPST_C0692 | bglG1 | transcription antiterminator                                         | 12.27       |
| [G]  | LPST_C0693 | -     | beta-glucosides PTS, EIIBC                                           | 5.41        |
| [S]  | LPST_C0694 | -     | hypothetical protein                                                 | 7.43        |
| [G]  | LPST_C0712 | pbg2  | 6-phospho-beta-glucosidase                                           | 2.42        |
| [K]  | LPST_C0726 | -     | transcription regulator                                              | 5.62        |
| [C]  | LPST_C0763 | -     | fumarate reductase, flavoprotein subunit precursor                   | 2.51        |
| [EH] | LPST_C0807 | als   | acetolactate synthase                                                | 2.81        |
| [C]  | LPST_C0855 | ndh2  | NADH dehydrogenase                                                   | 2.32        |
|      | LPST_C0866 | -     | hypothetical protein                                                 | 3.05        |
| [C]  | LPST_C0897 | mleS  | malate dehydrogenase                                                 | 2.35        |
| [R]  | LPST_C0898 | mleP2 | malate transport protein                                             | 3.14        |
| [C]  | LPST_C0903 | cydA  | cytochrome D ubiquinol oxidase, subunit I                            | 2.25        |
|      | LPST_C0907 | -     | hypothetical protein                                                 | 2.12        |
|      | LPST_C0939 | -     | hypothetical protein                                                 | 3.93        |
| [V]  | LPST_C0942 | pbpX1 | serine-type D-Ala-D-Ala carboxypeptidase                             | 3.86        |
| [D]  | LPST_C0960 | cps2B | exopolysaccharide biosynthesis protein; chain length determinant Wzz | 3.15        |
| [GM] | LPST_C0961 | cps2C | exopolysaccharide biosynthesis protein                               | 8.66        |
| [MG] | LPST_C0962 | galE2 | UDP-glucose 4-epimerase                                              | 2.47        |
|      | LPST_C0976 | -     | hypothetical protein                                                 | 2.46        |
|      | LPST_C0981 | -     | hypothetical protein                                                 | 2.60        |
| [R]  | LPST_C0983 | cps3A | glycosyltransferase                                                  | 2.01        |
| [GE] | LPST_C1013 | gntP  | gluconate transport protein                                          | 3.09        |

| COG    | Locus      | Gene  | Products                                                           | Fold Change |
|--------|------------|-------|--------------------------------------------------------------------|-------------|
| [G]    | LPST_C1014 | gntK  | gluconokinase                                                      | 2.74        |
| [G]    | LPST_C1015 | gnd1  | 6-phosphogluconate dehydrogenase-like protein                      | 2.17        |
|        | LPST_C1056 | sdr   | cell surface SD repeat-containing protein                          | 2.66        |
| [G]    | LPST_C1070 | -     | ABC superfamily ATP binding cassette transporter, membrane protein | 2.70        |
| [V]    | LPST_C1078 | -     | ABC superfamily ATP binding cassette transporter, ABC protein      | 2.36        |
| [R]    | LPST_C1085 | -     | cof family hydrolase                                               | 3.25        |
|        | LPST_C1090 | -     | extracellular protein, membrane-anchored                           | 3.11        |
| [P]    | LPST_C1111 | -     | sodium/sulfate symport protein (putative)                          | 3.13        |
| [KT]   | LPST_C1119 | -     | transcription regulator levR                                       | 2.30        |
|        | LPST_C1138 | -     | hypothetical protein                                               | 2.58        |
| [K]    | LPST_C1140 | -     | transcription regulator                                            | 2.06        |
| [S]    | LPST_C1147 | -     | DedA protein (DSG-1 protein)                                       | 2.02        |
|        | LPST_C1161 | -     | extracellular protein                                              | 2.03        |
|        | LPST_C1163 | -     | cell surface protein precursor                                     | 3.03        |
|        | LPST_C1164 | -     | extracellular protein                                              | 2.50        |
| [L]    | LPST_C1199 | cshA1 | crossover junction endodeoxyribonuclease                           | 2.39        |
| [M]    | LPST_C1201 | racD  | aspartate racemase                                                 | 2.10        |
| [M]    | LPST_C1202 | ica1  | glycosyltransferase                                                | 2.30        |
| [H]    | LPST_C1220 | -     | prenyltransferase                                                  | 2.02        |
| [C]    | LPST_C1225 | -     | acylphosphatase                                                    | 2.93        |
| [S]    | LPST_C1237 | -     | hypothetical protein                                               | 6.88        |
| [E]    | LPST_C1250 | glnA  | glutamate--ammonia ligase                                          | 2.04        |
| [K]    | LPST_C1257 | -     | transcription regulator                                            | 2.07        |
| [E]    | LPST_C1315 | trpF  | phosphoribosylanthranilate isomerase                               | 5.06        |
| [GEPR] | LPST_C1345 | -     | EmrB/QacA family drug resistance transporter                       | 2.22        |
| [G]    | LPST_C1383 | map3  | maltose phosphorylase                                              | 2.61        |
| [G]    | LPST_C1384 | galM2 | aldose 1-epimerase                                                 | 2.32        |
| [P]    | LPST_C1399 | -     | ABC transporter, permease protein                                  | 2.30        |
|        | LPST_C1408 | -     | hypothetical protein                                               | 9.60        |
|        | LPST_C1409 | -     | glycosyltransferase                                                | 4.12        |
| [G]    | LPST_C1429 | pgm5  | phosphoglycerate mutase (putative)                                 | 2.27        |
| [R]    | LPST_C1437 | -     | ABC transporter, permease protein                                  | 2.25        |

| COG    | Locus      | Gene  | Products                                                          | Fold Change |
|--------|------------|-------|-------------------------------------------------------------------|-------------|
| [S]    | LPST_C1442 | -     | integral membrane protein                                         | 2.17        |
|        | LPST_C1448 | -     | hypothetical protein                                              | 3.24        |
| [C]    | LPST_C1464 | gshR3 | glutathione reductase                                             | 2.17        |
|        | LPST_C1465 | -     | integral membrane protein                                         | 4.26        |
| [M]    | LPST_C1466 | -     | glycosyltransferase (putative)                                    | 2.55        |
| [E]    | LPST_C1488 | -     | hypothetical protein                                              | 2.18        |
| [K]    | LPST_C1489 | -     | transcription regulator                                           | 2.16        |
|        | LPST_C1502 | -     | hypothetical protein                                              | 3.24        |
| [R]    | LPST_C1506 | -     | possible sugar-phosphatase                                        | 2.91        |
| [G]    | LPST_C1535 | pps   | phosphoenolpyruvate synthase                                      | 2.29        |
| [K]    | LPST_C1537 | -     | transcription regulator                                           | 2.06        |
| [P]    | LPST_C1542 | mntA  | cadmium-/manganese-transporting P-type ATPase                     | 2.02        |
| [G]    | LPST_C1543 | eno   | phosphopyruvate hydratase                                         | 2.02        |
| [KG]   | LPST_C1548 | -     | transcription regulator                                           | 2.25        |
|        | LPST_C1551 | -     | hypothetical protein                                              | 11.22       |
| [K]    | LPST_C1556 | -     | transcription regulator                                           | 2.18        |
| [MG]   | LPST_C1558 | -     | NAD-dependent epimerase/dehydratase                               | 3.16        |
| [K]    | LPST_C1560 | -     | transcription regulator                                           | 2.45        |
| [TK]   | LPST_C1564 | rrp6  | response regulator                                                | 2.37        |
|        | LPST_C1570 | -     | transcription regulator                                           | 3.59        |
| [IQ]   | LPST_C1611 | dltC1 | D-alanine--poly(phosphoribitol) ligase subunit 2                  | 2.18        |
| [V]    | LPST_C1615 | pbpX2 | serine-type D-Ala-D-Ala carboxypeptidase                          | 2.35        |
|        | LPST_C1650 | -     | hypothetical protein                                              | 2.33        |
| [GEPR] | LPST_C1717 | -     | integral membrane protein                                         | 2.23        |
|        | LPST_C1733 | cps4H | polysaccharide polymerase                                         | 2.30        |
| [M]    | LPST_C1735 | cps4F | glycosyltransferase                                               | 2.30        |
| [M]    | LPST_C1736 | cps4E | priming glycosyltransferase                                       | 7.10        |
| [GEPR] | LPST_C1754 | -     | multidrug transport protein                                       | 2.72        |
| [G]    | LPST_C1772 | suhB  | myo-inositol-1(or 4)-monophosphatase                              | 2.64        |
| [S]    | LPST_C1773 | -     | hypothetical protein                                              | 2.08        |
|        | LPST_C1774 | ldhL1 | possible malate/lactate dehydrogenase                             | 2.81        |
| [C]    | LPST_C1775 | pdhD  | dihydrolipoamide dehydrogenase                                    | 33.46       |
| [C]    | LPST_C1776 | pdhC  | pyruvate dehydrogenase complex dihydrolipoamide acetyltransferase | 47.18       |

| COG  | Locus      | Gene  | Products                                                                              | Fold Change |
|------|------------|-------|---------------------------------------------------------------------------------------|-------------|
| [C]  | LPST_C1777 | pdhB  | pyruvate dehydrogenase complex, E1 component,<br>beta subunit                         | 33.23       |
| [C]  | LPST_C1778 | pdhA  | pyruvate dehydrogenase complex, E1 component,<br>alpha subunit                        | 24.46       |
|      | LPST_C1784 | -     | hypothetical protein                                                                  | 2.01        |
| [G]  | LPST_C1834 | -     | hypothetical protein                                                                  | 2.42        |
| [R]  | LPST_C1841 | coiA  | competence protein                                                                    | 2.19        |
| [P]  | LPST_C1843 | nrpR3 | negative regulator of proteolysis                                                     | 2.29        |
|      | LPST_C1847 | -     | hypothetical protein                                                                  | 2.67        |
| [NU] | LPST_C1863 | comGB | ComG operon protein 2                                                                 | 3.34        |
| [G]  | LPST_C1936 | treC  | oligo-1,6-glucosidase (oligosaccharide<br>alpha-1,6-glucosidase)                      | 2.12        |
| [G]  | LPST_C1940 | -     | PTS family mannose/fructose/sorbose porter<br>component IIB                           | 5.84        |
| [J]  | LPST_C1961 | -     | ribosomal protein acetylating enzyme                                                  | 2.08        |
| [M]  | LPST_C1962 | murA2 | UDP-N-acetylglucosamine 1-carboxyvinyltransferase                                     | 2.33        |
| [G]  | LPST_C1982 | pmi   | mannose-6-phosphate isomerase                                                         | 2.22        |
|      | LPST_C1990 | -     | hypothetical protein                                                                  | 2.14        |
|      | LPST_C2004 | -     | prophage major tail protein                                                           | 2.48        |
|      | LPST_C2025 | -     | prophage Lp2 protein 24                                                               | 3.90        |
|      | LPST_C2026 | -     | prophage Lp2 protein 23                                                               | 2.14        |
|      | LPST_C2027 | -     | prophage Lp1 protein 22                                                               | 3.96        |
|      | LPST_C2029 | -     | prophage Lp2 protein 20                                                               | 2.39        |
| [E]  | LPST_C2041 | -     | hypothetical protein                                                                  | 2.20        |
|      | LPST_C2051 | -     | hypothetical protein                                                                  | 3.27        |
| [V]  | LPST_C2059 | -     | ABC superfamily ATP binding cassette transporter,<br>ATP-binding and permease protein | 2.13        |
|      | LPST_C2085 | -     | hypothetical protein                                                                  | 2.52        |
| [R]  | LPST_C2097 | npr2  | NADH peroxidase                                                                       | 3.71        |
| [E]  | LPST_C2103 | hisE  | phosphoribosyl-ATP pyrophosphatase                                                    | 5.40        |
|      | LPST_C2129 | -     | cell surface protein precursor                                                        | 2.26        |
| [G]  | LPST_C2134 | -     | sugar transport protein                                                               | 2.75        |
| [G]  | LPST_C2139 | tal1  | fructose-6-phosphate aldolase                                                         | 2.61        |
| [R]  | LPST_C2140 | -     | HAD superfamily hydrolase                                                             | 2.33        |

| COG  | Locus      | Gene  | Products                                                             | Fold Change |
|------|------------|-------|----------------------------------------------------------------------|-------------|
| [K]  | LPST_C2153 | -     | transcription regulator                                              | 3.04        |
|      | LPST_C2157 | -     | transcription regulator                                              | 3.42        |
|      | LPST_C2159 | -     | hypothetical protein                                                 | 2.62        |
|      | LPST_C2160 | -     | acetyltransferase (putative)                                         | 2.43        |
| [EH] | LPST_C2161 | pox3  | pyruvate oxidase                                                     | 6.35        |
| [H]  | LPST_C2172 | lplA1 | lipoate-protein ligase                                               | 2.03        |
| [G]  | LPST_C2174 | -     | N-acetylglucosamine/galactosamine PTS, EIIA                          | 5.41        |
| [G]  | LPST_C2175 | -     | N-acetylgalactosamine-specific PTS system<br>transporter subunit IID | 4.96        |
| [G]  | LPST_C2176 | -     | N-acetylgalactosamine PTS, EIIC                                      | 3.74        |
| [G]  | LPST_C2177 | -     | N-acetylgalactosamine-specific PTS system<br>transporter subunit IIB | 3.10        |
| [E]  | LPST_C2206 | araT2 | aromatic amino acid specific aminotransferase                        | 2.07        |
| [EF] | LPST_C2221 | pyrAA | carbamoyl phosphate synthase small subunit                           | 2.55        |
| [E]  | LPST_C2232 | -     | hypothetical protein                                                 | 2.44        |
| [R]  | LPST_C2242 | -     | NADPH-dependent FMN reductase domain protein                         | 3.43        |
| [T]  | LPST_C2255 | -     | universal stress protein UspA                                        | 2.05        |
| [G]  | LPST_C2265 | -     | glucan 1,4-alpha-maltohydrolase                                      | 4.08        |
| [R]  | LPST_C2275 | -     | acetyltransferase (putative)                                         | 2.64        |
| [E]  | LPST_C2282 | dsdA  | D-serine ammonia-lyase                                               | 2.50        |
| [G]  | LPST_C2283 | pbg4  | 6-phospho-beta-glucosidase                                           | 8.87        |
| [G]  | LPST_C2284 | pbg5  | 6-phospho-beta-glucosidase                                           | 7.19        |
| [G]  | LPST_C2286 | -     | cellobiose PTS, EIIA                                                 | 2.75        |
| [K]  | LPST_C2288 | -     | transcription regulator                                              | 3.79        |
| [R]  | LPST_C2291 | -     | HAD superfamily hydrolase                                            | 3.91        |
| [E]  | LPST_C2300 | aroC1 | 3-dehydroquinate dehydratase                                         | 2.58        |
| [E]  | LPST_C2301 | -     | amino acid transport protein                                         | 5.26        |
| [S]  | LPST_C2311 | -     | hypothetical protein                                                 | 2.10        |
|      | LPST_C2322 | -     | integral membrane protein                                            | 2.94        |
| [J]  | LPST_C2329 | -     | ribosomal protein acetylating enzyme                                 | 2.30        |
| [MG] | LPST_C2375 | -     | oxidoreductase                                                       | 2.24        |
| [P]  | LPST_C2424 | -     | transport protein                                                    | 2.59        |
| [S]  | LPST_C2427 | -     | hypothetical protein                                                 | 2.05        |
| [K]  | LPST_C2439 | -     | transcription regulator                                              | 3.56        |

| COG   | Locus      | Gene  | Products                                                                                     | Fold Change |
|-------|------------|-------|----------------------------------------------------------------------------------------------|-------------|
| [G]   | LPST_C2445 | -     | PTS family N-acetylglucosamine porter, IIABC component                                       | 4.98        |
| [E]   | LPST_C2455 | livD  | branched-chain amino acid ABC transporter, ATP-binding protein                               | 2.29        |
| [E]   | LPST_C2456 | livC  | branched-chain amino acid ABC superfamily ATP binding cassette transporter, permease protein | 2.20        |
| [G]   | LPST_C2476 | -     | cellobiose PTS, EIIB                                                                         | 4.86        |
| [G]   | LPST_C2477 | -     | cellobiose PTS, EIIC                                                                         | 4.49        |
| [G]   | LPST_C2478 | pbg6  | 6-phospho-beta-glucosidase                                                                   | 2.51        |
|       | LPST_C2483 | -     | integral membrane protein                                                                    | 2.31        |
|       | LPST_C2499 | -     | hypothetical protein                                                                         | 2.95        |
| [P]   | LPST_C2514 | copA  | P-ATPase superfamily P-type ATPase copper transporter                                        | 2.23        |
| [R]   | LPST_C2533 | -     | HAD superfamily hydrolase                                                                    | 2.14        |
| [C]   | LPST_C2541 | gabD  | succinate-semialdehyde dehydrogenase (NAD(P)+)                                               | 2.48        |
| [R]   | LPST_C2542 | -     | muramidase (putative)                                                                        | 2.02        |
| [S]   | LPST_C2549 | -     | integral membrane protein                                                                    | 2.71        |
| [R]   | LPST_C2562 | -     | hypothetical protein                                                                         | 3.50        |
| [IQR] | LPST_C2563 | -     | short-chain dehydrogenase/oxidoreductase                                                     | 2.41        |
| [M]   | LPST_C2570 | lepA2 | GTP-binding protein LepA                                                                     | 2.10        |
| [K]   | LPST_C2574 | -     | transcription regulator                                                                      | 2.29        |
| [G]   | LPST_C2580 | pbg1  | 6-phospho-beta-glucosidase                                                                   | 7.75        |
| [G]   | LPST_C2581 | celD  | cellobiose PTS, EIIC                                                                         | 6.57        |
|       | LPST_C2582 | -     | hypothetical protein                                                                         | 5.65        |
| [KE]  | LPST_C2641 | -     | aminotransferase                                                                             | 2.33        |
| [K]   | LPST_C2647 | -     | transcription regulator (putative)                                                           | 3.65        |
| [G]   | LPST_C2650 | pts26 | sucrose PTS, EIIBCA                                                                          | 2.17        |
| [G]   | LPST_C2651 | agl4  | alpha-glucosidase                                                                            | 2.08        |
| [K]   | LPST_C2652 | sacR2 | transcription regulator                                                                      | 4.80        |
| [G]   | LPST_C2663 | -     | phosphotransferase system fructose-specific component IIA                                    | 2.13        |
| [GT]  | LPST_C2666 | mtlR  | transcription regulator, mannitol operon                                                     | 3.01        |
| [MG]  | LPST_C2668 | -     | oxidoreductase                                                                               | 2.90        |
|       | LPST_C2678 | -     | hypothetical protein                                                                         | 4.98        |



| COG    | Locus      | Gene  | Products                                    | Fold Change |
|--------|------------|-------|---------------------------------------------|-------------|
|        | LPST_C2712 | -     | hypothetical protein                        | 5.16        |
| [C]    | LPST_C2728 | pflB2 | formate C-acetyltransferase                 | 7.90        |
| [O]    | LPST_C2729 | pflA2 | formate acetyltransferase activating enzyme | 27.23       |
| [R]    | LPST_C2731 | -     | hypothetical protein                        | 2.39        |
| [R]    | LPST_C2732 | -     | oxidoreductase                              | 3.60        |
| [S]    | LPST_C2762 | -     | integral membrane protein                   | 5.33        |
| [S]    | LPST_C2763 | -     | integral membrane protein                   | 3.82        |
|        | LPST_C2796 | -     | transcription regulator (putative)          | 2.26        |
| [C]    | LPST_C2797 | pck   | phosphoenolpyruvate carboxykinase (ATP)     | 3.68        |
| [G]    | LPST_C2814 | glpF5 | glycerol uptake facilitator protein         | 2.99        |
| [OC]   | LPST_C2815 | -     | thioredoxin                                 | 2.23        |
|        | LPST_C2826 | -     | extracellular protein                       | 2.67        |
|        | LPST_C2827 | -     | cell surface protein precursor              | 5.03        |
| [GEPR] | LPST_C2843 | -     | sugar transport protein                     | 3.21        |
|        | LPST_C2844 | ram2  | alpha-L-rhamnosidase (putative)             | 2.32        |
| [M]    | LPST_C2851 | galE4 | UDP-glucose 4-epimerase                     | 2.06        |
| [G]    | LPST_C2852 | galK  | galactokinase                               | 2.53        |
| [G]    | LPST_C2853 | lacL  | beta-galactosidase large subunit            | 3.84        |
| [G]    | LPST_C2854 | lacM  | beta-galactosidase, small subunit           | 2.88        |
| [G]    | LPST_C2857 | galM3 | aldose 1-epimerase                          | 3.58        |
| [C]    | LPST_C2859 | -     | oxidoreductase                              | 2.18        |
| [R]    | LPST_C2868 | est2  | acetyltransferase                           | 2.40        |
| [G]    | LPST_C2870 | -     | cellobiose PTS, EIIC                        | 2.06        |
| [R]    | LPST_C2871 | -     | N-acetylmuramic acid 6-phosphate etherase   | 2.08        |
| [G]    | LPST_C2872 | -     | N-acetylglucosamine kinase (putative)       | 2.08        |
| [G]    | LPST_C2875 | -     | beta-glucosides PTS, EIIBCA                 | 2.13        |
| [K]    | LPST_C2876 | bglG4 | transcription antiterminator                | 2.42        |
| [G]    | LPST_C2877 | pbg9  | 6-phospho-beta-glucosidase                  | 4.26        |
| [G]    | LPST_C2878 | pbg10 | 6-phospho-beta-glucosidase                  | 3.04        |
| [G]    | LPST_C2879 | -     | beta-glucosides PTS, EIIBCA                 | 2.49        |
| [K]    | LPST_C2880 | bglG5 | transcription antiterminator                | 2.77        |
| [G]    | LPST_C2884 | agl5  | alpha-glucosidase                           | 2.02        |
| [R]    | LPST_C2887 | -     | HAD superfamily hydrolase                   | 4.20        |
| [G]    | LPST_C2888 | tkf4  | transketolase                               | 2.15        |

| COG    | Locus      | Gene  | Products                                                                | Fold Change |
|--------|------------|-------|-------------------------------------------------------------------------|-------------|
| [GT]   | LPST_C2892 | -     | hypothetical protein                                                    | 4.78        |
| [ER]   | LPST_C2895 | gutB  | L-iditol 2-dehydrogenase                                                | 2.57        |
| [G]    | LPST_C2896 | -     | galacitol PTS, EIIC                                                     | 2.26        |
| [GT]   | LPST_C2898 | -     | galacitol PTS, EIIA                                                     | 4.77        |
| [KG]   | LPST_C2899 | -     | transcription regulator                                                 | 2.40        |
| [G]    | LPST_C2900 | xpk2  | putative phosphoketolase                                                | 2.69        |
| [G]    | LPST_C2903 | araA  | L-arabinose isomerase                                                   | 2.31        |
| [G]    | LPST_C2905 | araB  | L-ribulokinase                                                          | 2.40        |
| [GEPR] | LPST_C2906 | araT  | arabinose transport protein                                             | 2.33        |
| [S]    | LPST_C2909 | -     | hypothetical protein                                                    | 2.13        |
| [I]    | LPST_C2911 | -     | lipase/esterase (putative)                                              | 2.04        |
| [P]    | LPST_C2913 | napA4 | Na(+)/H(+) antiporter                                                   | 2.07        |
| [KG]   | LPST_C2915 | -     | sugar kinase and transcription regulator                                | 2.42        |
| [G]    | LPST_C2917 | -     | N-acetylmannosamine-6-phosphate 2-epimerase                             | 2.82        |
| [K]    | LPST_C2932 | -     | transcription regulator (putative)                                      | 5.16        |
| [EH]   | LPST_C2933 | pox5  | pyruvate oxidase                                                        | 12.37       |
| [G]    | LPST_C2936 | rhaD  | Rhamnulose-1-phosphate aldolase                                         | 2.47        |
| [G]    | LPST_C2940 | rhaB  | rhamnulokinase                                                          | 2.17        |
| [GEPR] | LPST_C2941 | -     | MFS family rhamnose transport protein                                   | 2.38        |
| [G]    | LPST_C2961 | bgl   | beta-glucosidase                                                        | 3.02        |
| [KG]   | LPST_C2962 | -     | ROK family protein                                                      | 2.90        |
| [G]    | LPST_C2963 | -     | family 38 glycosyl hydrolase                                            | 3.22        |
| [S]    | LPST_C2964 | -     | hypothetical protein                                                    | 2.12        |
| [G]    | LPST_C2966 | -     | alpha-1,2-mannosidase (putative)                                        | 3.55        |
| [G]    | LPST_C2967 | msmK2 | multiple sugar ABC transporter, ATP-binding protein                     | 3.43        |
| [T]    | LPST_C2969 | rrp12 | response regulator                                                      | 2.15        |
| [T]    | LPST_C2970 | hpk12 | histidine protein kinase; sensor protein                                | 2.25        |
| [G]    | LPST_C2973 | -     | sugar ABC transporter, substrate binding protein                        | 2.27        |
| [G]    | LPST_C2974 | -     | sugar ABC transporter, permease protein                                 | 2.59        |
| [G]    | LPST_C2975 | -     | sugar ABC transporter, permease protein                                 | 2.91        |
|        | LPST_C2976 | -     | hypothetical protein                                                    | 2.39        |
| [K]    | LPST_C2977 | -     | AraC family transcriptional regulator                                   | 2.80        |
| [V]    | LPST_C2978 | -     | multidrug ABC superfamily ATP binding cassette transporter, ABC protein | 2.04        |

---

| COG   | Locus      | Gene  | Products                                | Fold Change |
|-------|------------|-------|-----------------------------------------|-------------|
| [G]   | LPST_C2982 | -     | sorbitol PTS, EIIA                      | 4.67        |
| [G]   | LPST_C2983 | -     | sorbitol PTS, EIIBC                     | 4.56        |
| [G]   | LPST_C2984 | -     | sorbitol PTS, EIIC                      | 5.00        |
|       | LPST_C2985 | srIM2 | sorbitol operon activator               | 3.46        |
| [K]   | LPST_C2986 | srIR2 | sorbitol operon transcription regulator | 3.35        |
| [IQR] | LPST_C2987 | srID2 | sorbitol-6-phosphate 2-dehydrogenase    | 2.58        |
| [G]   | LPST_C2988 | rbsU  | ribose transport protein                | 2.11        |
| [G]   | LPST_C2989 | rbsD  | D-ribose pyranase                       | 11.21       |

---

**Table S5** The down-regulated genes for *L.plantarum* ST-III grown in the presence of FOS versus glucose

| COG   | Locus      | Gene  | Products                                                      | Fold Change |
|-------|------------|-------|---------------------------------------------------------------|-------------|
|       | LPST_C0150 | -     | integral membrane protein                                     | 0.44        |
| [C]   | LPST_C0172 | ack1  | acetate kinase                                                | 0.38        |
| [D]   | LPST_C0174 | -     | integral membrane protein                                     | 0.29        |
| [D]   | LPST_C0175 | -     | integral membrane protein                                     | 0.48        |
| [R]   | LPST_C0198 | -     | NADPH-dependent FMN reductase                                 | 0.41        |
| [C]   | LPST_C0274 | acdH  | acetaldehyde dehydrogenase                                    | 0.50        |
| [H]   | LPST_C0466 | -     | transport protein                                             | 0.50        |
| [G]   | LPST_C0484 | -     | mannose PTS, EIIAB                                            | 0.03        |
| [G]   | LPST_C0485 | pts9C | mannose PTS, EIIC                                             | 0.04        |
| [G]   | LPST_C0486 | pts9D | PTS family mannose/fructose/sorbose porter<br>component IID   | 0.03        |
| [C]   | LPST_C0651 | -     | nitro/flavin reductase                                        | 0.49        |
|       | LPST_C0658 | -     | integral membrane protein                                     | 0.48        |
| [R]   | LPST_C0873 | -     | hypothetical protein                                          | 0.23        |
| [P]   | LPST_C0883 | -     | cation transport protein                                      | 0.49        |
| [I]   | LPST_C1327 | fabZ1 | (3R)-hydroxymyristoyl-[acyl carrier protein]<br>dehydratase   | 0.09        |
| [I]   | LPST_C1328 | fabH2 | beta-ketoacyl-acyl-carrier-protein synthase III               | 0.11        |
| [IQ]  | LPST_C1329 | acpA2 | acyl carrier protein                                          | 0.12        |
| [I]   | LPST_C1330 | fabD  | (acyl-carrier protein) S-malonyltransferase                   | 0.09        |
| [IQR] | LPST_C1331 | fabG1 | 3-oxoacyl-[acyl-carrier protein] reductase                    | 0.09        |
| [IQ]  | LPST_C1332 | fabF  | 3-oxoacyl-[acyl-carrier protein] synthase II                  | 0.08        |
| [I]   | LPST_C1333 | accB2 | acetyl-CoA carboxylase, biotin carboxyl carrier protein       | 0.08        |
| [I]   | LPST_C1334 | fabZ2 | (3R)-hydroxymyristoyl-[acyl carrier protein]<br>dehydratase   | 0.09        |
| [I]   | LPST_C1335 | accC2 | acetyl-CoA carboxylase, biotin carboxylase subunit            | 0.08        |
| [I]   | LPST_C1336 | accD2 | acetyl-CoA carboxylase, carboxyl transferase subunit<br>beta  | 0.08        |
| [I]   | LPST_C1337 | accA2 | acetyl-CoA carboxylase, carboxyl transferase subunit<br>alpha | 0.08        |

| COG  | Locus      | Gene | Products                                          | Fold Change |
|------|------------|------|---------------------------------------------------|-------------|
| [I]  | LPST_C1338 | fabI | enoyl-(acyl carrier protein) reductase            | 0.07        |
| [H]  | LPST_C1339 | -    | phosphopantetheinyltransferase                    | 0.07        |
| [R]  | LPST_C1340 | -    | integral membrane protein                         | 0.16        |
| [K]  | LPST_C1341 | -    | transcription regulator                           | 0.16        |
| [I]  | LPST_C1342 | -    | cytosolic long-chain acyl-CoA thioester hydrolase | 0.13        |
| [L]  | LPST_C1453 | -    | transposase                                       | 0.33        |
| [G]  | LPST_C2062 | -    | sugar transport protein                           | 0.44        |
| [G]  | LPST_C2086 | -    | N-acetylglucosamine and glucose PTS, EIICBA       | 0.23        |
| [F]  | LPST_C2226 | pucK | xanthine / uracil transport protein               | 0.50        |
| [MG] | LPST_C2357 | -    | NAD-dependent epimerase/dehydratase               | 0.40        |
| [R]  | LPST_C2373 | -    | 2,5-diketo-D-gluconate reductase                  | 0.38        |
| [R]  | LPST_C2432 | -    | possible toxin regulator                          | 0.29        |
|      | LPST_C2519 | -    | hypothetical protein                              | 0.41        |
| [S]  | LPST_C2683 | -    | DegV family protein                               | 0.35        |

## REFERENCES

1. **Lambert JM, Bongers RS, Kleerebezem M.** 2007. Cre-lox-based system for multiple gene deletions and selectable-marker removal in *Lactobacillus plantarum*. *Appl Environ Microbiol* **73**:1126-1135.
